# Supplementary material
Source: Springer Nature journal article supplement (https://www.springermedizin.de/resource/supplementary/12885_2012_3710_MOESM2_ESM.pdf/9465958)

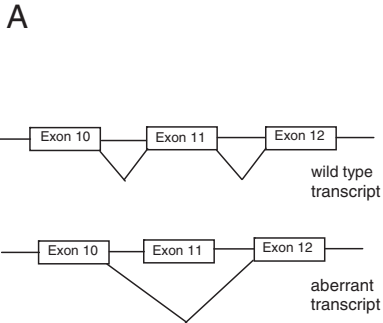

**B**

| CLL specimen | Fold increase in total wild type E-cadherin transcript. (mean $\pm$ SD) | Fold change in total aberrant E-cadherin transcript |
|--------------|-------------------------------------------------------------------------|-----------------------------------------------------|
| CLL#1        | 119 $\pm$ 12                                                            | 5 fold increase                                     |
| CLL#2        | 56 $\pm$ 2.5                                                            | undetectable                                        |
| CLL#3        | 21 $\pm$ 6.5                                                            | 1.2 fold increase                                   |
| CLL#4        | 14 $\pm$ 2                                                              | 6 fold increase                                     |
| CLL#5        | 11 $\pm$ 4                                                              | undetectable                                        |
| CLL#6        | 9.8 $\pm$ 1.5                                                           | 4 fold increase                                     |
| CLL#7        | 5 $\pm$ 0.5                                                             | 1.3 fold decrease                                   |
| CLL#8        | 9.8 $\pm$ 1.5                                                           | 1.3 fold decrease                                   |
| CLL#9        | No induction                                                            | No change                                           |
| CLL#10       | No induction                                                            | undetectable                                        |

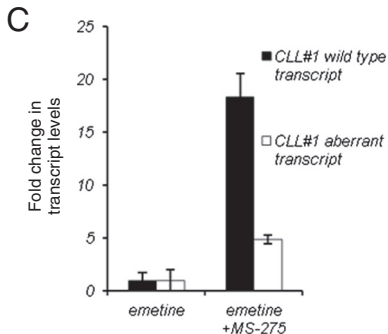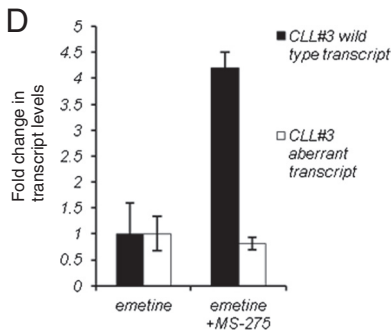

Supplement: MOESM2 [file 9465958]
